# Supplementary material for: Vitamin E ameliorates neurodegeneration related phenotypes caused by neurotoxicity of Al2O3-nanoparticles in C. elegans
Source: Royal Society of Chemistry journal article supplement (doi:10.1039/c5tx00029g), 2015-01-01
Supplement: c5tx00029g1.pdf [file c5tx00029g1.pdf]

**Supporting Information:**

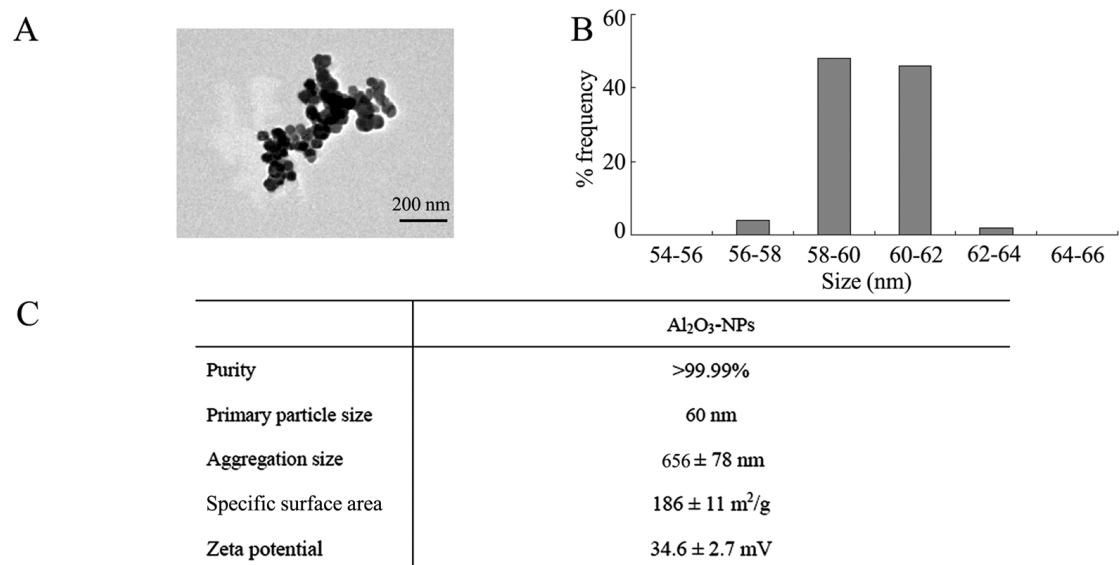

**Fig. S1** Physicochemical properties of Al<sub>2</sub>O<sub>3</sub>-NPs. (A) TEM picture of Al<sub>2</sub>O<sub>3</sub>-NPs in K-medium. (B) Size distribution of Al<sub>2</sub>O<sub>3</sub>-NPs in K-medium based on the TEM assay (n = 400). (C) Summary of physicochemical properties of Al<sub>2</sub>O<sub>3</sub>-NPs.

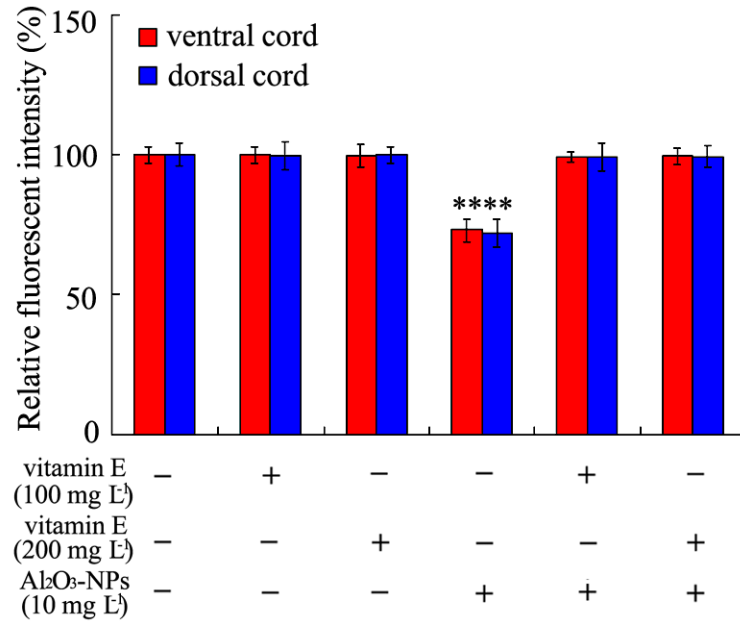

**Fig. S2** Effects of vitamin E pretreatment on fluorescent intensity of nerve cords for D-type GABAergic nervous system in Al<sub>2</sub>O<sub>3</sub>-NPs exposed *oxIs12* transgenic nematodes. Vitamin E pretreatment was performed at the L2-larvae stage for 24-h. Al<sub>2</sub>O<sub>3</sub>-NPs exposure was performed from L4-larvae for 24-h. Five replicates were performed. Bars represent means  $\pm$  SEM. \*\*\*\* $P < 0.01$  vs value of nematodes without vitamin E and Al<sub>2</sub>O<sub>3</sub>-NPs treatments.

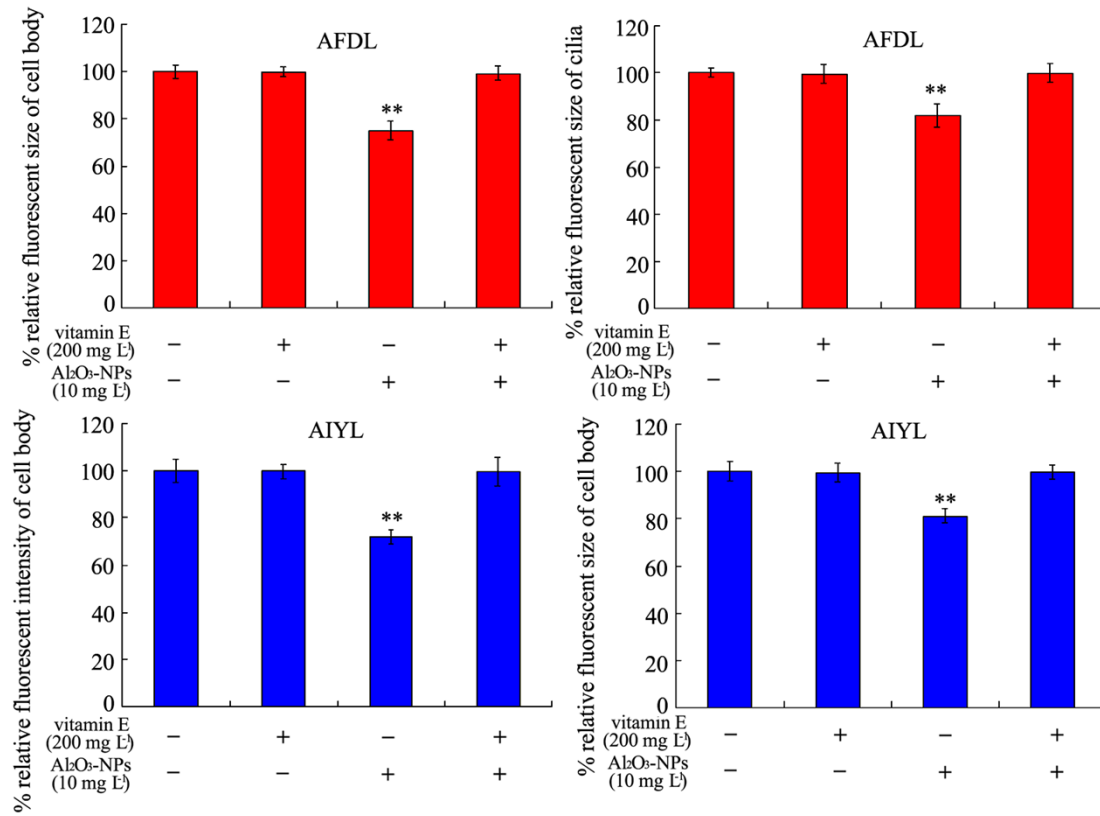

**Fig. S3** Quantification analysis on the effects of pretreatment with vitamin E on development of AFD and AIY neurons of Al<sub>2</sub>O<sub>3</sub>-NPs exposed nematodes. Vitamin E pretreatment was performed at the L2-larvae stage for 24-h. Al<sub>2</sub>O<sub>3</sub>-NPs exposure was performed from L4-larvae for 24-h. Five replicates were performed. Bars represent means  $\pm$  SEM. \*\* $P < 0.01$  vs value of nematodes without vitamin E and Al<sub>2</sub>O<sub>3</sub>-NPs treatments.

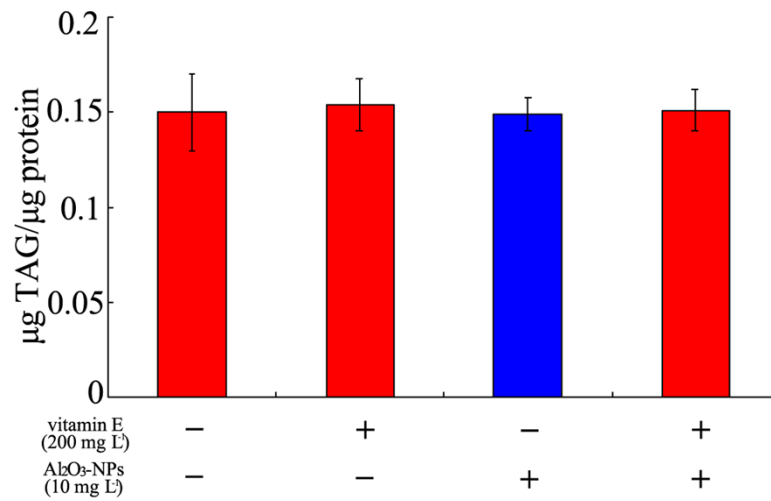

**Fig. S4** Effects of vitamin E pretreatment on triglyceride amount in Al<sub>2</sub>O<sub>3</sub>-NPs exposed wild-type N2 nematodes. Vitamin E pretreatment was performed at the L2-larvae stage for 24-h. Al<sub>2</sub>O<sub>3</sub>-NPs exposure was performed from L4-larvae for 24-h. Ten replicates were performed. Bars represent means  $\pm$  SEM.

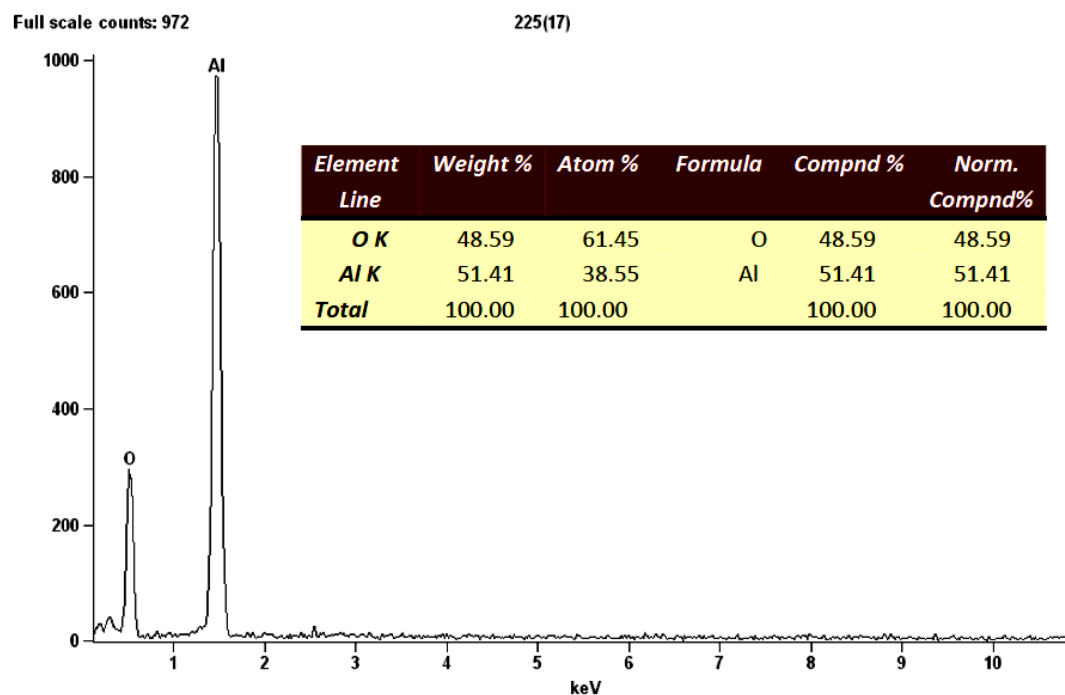

**Fig. S5** EDX assay result for Al<sub>2</sub>O<sub>3</sub>-NPs particles in intestinal cell on TEM section.

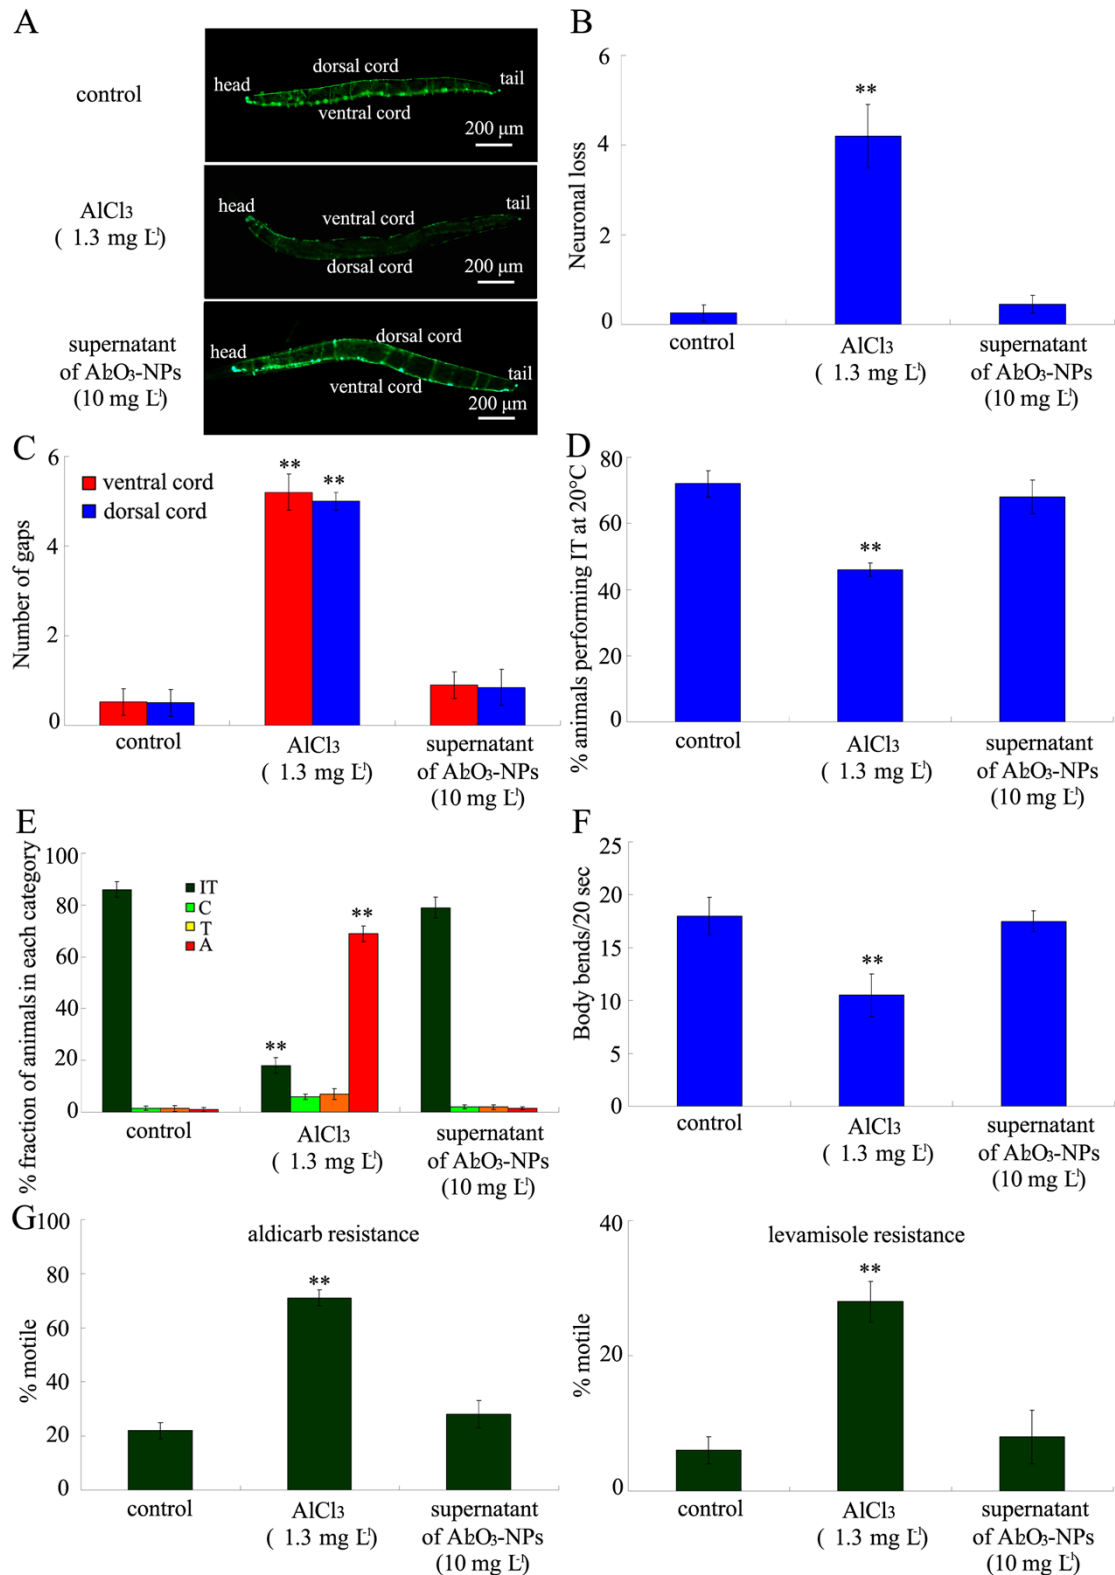

**Fig. S6** Effects of AlCl<sub>3</sub> or supernatant of Al<sub>2</sub>O<sub>3</sub>-NPs on development and function of neurons. (A) Effects of AlCl<sub>3</sub> or supernatant of Al<sub>2</sub>O<sub>3</sub>-NPs on development of D-type GABAergic neurons. (B) Effects of AlCl<sub>3</sub> or supernatant of Al<sub>2</sub>O<sub>3</sub>-NPs in inducing neuronal loss in D-type GABAergic neurons. (C) Effects of AlCl<sub>3</sub> or supernatant of Al<sub>2</sub>O<sub>3</sub>-NPs in inducing

gaps on nerve cords. (D) Comparison of thermotaxis learning between control and  $\text{AlCl}_3$  or supernatant of  $\text{Al}_2\text{O}_3$ -NPs exposed nematodes at 12-h in the assay system. (E) Comparison of thermotaxis perception between control and  $\text{AlCl}_3$  or supernatant of  $\text{Al}_2\text{O}_3$ -NPs exposed nematodes. T, thermophilic; C, movement to  $17^\circ\text{C}$ ; A, movement across the thermal gradient ( $17^\circ\text{C}/25^\circ\text{C}$ ); IT, movement at  $20^\circ\text{C}$ . (F) Comparison of body bend between control and  $\text{AlCl}_3$  or supernatant of  $\text{Al}_2\text{O}_3$ -NPs exposed nematodes. (G) Effects of  $\text{AlCl}_3$  or supernatant of  $\text{Al}_2\text{O}_3$ -NPs on neurotransmission of nematodes. The presynaptic function was evaluated by aldicarb resistance, and the postsynaptic function was evaluated by levamisole resistance. Exposure was performed from L4-larvae for 24-h. Five replicates were performed. Bars represent means  $\pm$  SEM.  $**P < 0.01$ .



**Table S 1** Primers used for quantitative real-time polymerase chain reaction (PCR)

| Gene          | Forward primer       | Reverse primer         |
|---------------|----------------------|------------------------|
| <i>tba-1</i>  | TCAACACTGCCATCGCCGCC | TCCAAGCGAGACCAGGCTTCAG |
| <i>unc-30</i> | TCTACCAACAGCCCAAGC   | TAAGGTTGGCCGAGCGAT     |
| <i>ttx-1</i>  | TGGACCCGAGTTCAC TTAT | GTTGGTTAGCATTCCACGAC   |
| <i>ttx-3</i>  | GACGACAACAACAGCACCAC | GTTTCGATCGTTGGCTTCCG   |

**Table S 2** Information for targeted genes

| Gene          | Products of the genes                                | Function                               |
|---------------|------------------------------------------------------|----------------------------------------|
| <i>unc-30</i> | Pitx family of homeodomain transcription factors     | specify cell fate of GABAergic neurons |
| <i>ttx-1</i>  | OTD/OTX subclass of homeodomain transcription factor | specify cell fate of AFD neurons       |
| <i>ttx-3</i>  | LIM homeodomain protein                              | specify cell fate of AIY neurons       |
